# Supplementary material for: Diurnal variation in declarative memory and the involvement of SCOP in cognitive functions in nonhuman primates
Source: Springer Nature journal article supplement (doi:10.1186/s13041-023-01022-0), 2023-03-25
Supplement: MOESM1 [file 25664834]

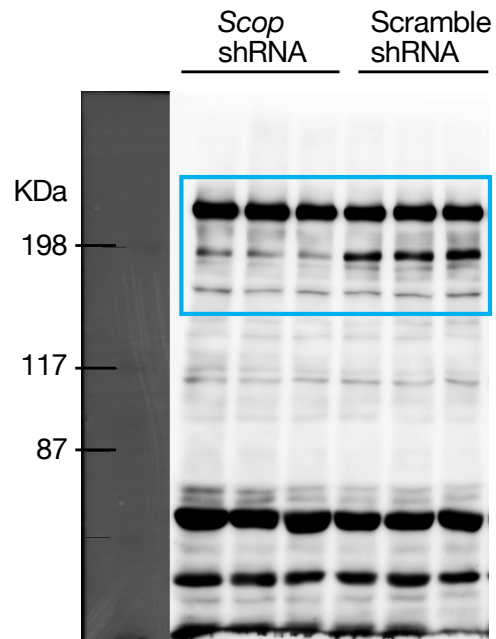

**Additional file 1:** The full image of the western blot data shown in Fig.3b in the main manuscript. The blue square is the cropped area.
